# Supplementary material for: Icotinib antagonizes ABCG2-mediated multidrug resistance, but not the pemetrexed resistance mediated by thymidylate synthase and ABCG2
Source: PubMed Central journal article supplement (PMC4147343; doi:10.18632/oncotarget.2102), 2014-06-13
Supplement: oncotarget-05-4529-s001.pdf [file oncotarget-05-4529-s001.pdf]

## Icotinib antagonizes ABCG2-mediated multidrug resistance, but not the pemetrexed resistance mediated by thymidylate synthase and ABCG2

### Supplementary Material

**Supplementary Table S1:** The reversal efficacy of Icotinib in ABCB1- and ABCC10-mediated drug resistance.

| Compounds              | IC <sub>50</sub> ± SD <sup>a</sup> (μM) |                   |                  |                   |                  |                   |
|------------------------|-----------------------------------------|-------------------|------------------|-------------------|------------------|-------------------|
|                        | HEK293/pcDNA3.1                         | (RF) <sup>b</sup> | HEK/ABCB1        | (RF) <sup>b</sup> | HEK/ABCC10       | (RF) <sup>b</sup> |
| Vincristine (μM)       | 0.0128 ± 0.0006                         | 1.0               | 0.1793 ± 0.0143  | 14.0              | 0.0896 ± 0.0072  | 7.0               |
| + Icotinib 1.0 μM      | 0.0118 ± 0.0008                         | 0.9               | 0.1738 ± 0.0104  | 13.6              | 0.0827 ± 0.0074  | 6.5               |
| + Icotinib 5.0 μM      | 0.0125 ± 0.0010                         | 1.0               | 0.1624 ± 0.0073  | 12.7              | 0.0812 ± 0.0041  | 6.3               |
| + Verapamil 5.0 μM     | 0.0129 ± 0.0006                         | 1.0               | 0.0150 ± 0.0011* | 1.2               |                  |                   |
| + Cepharanthine 2.5 μM | 0.0104 ± 0.0009                         | 0.8               |                  |                   | 0.0166 ± 0.0007* | 1.3               |

a. IC<sub>50</sub> values are represented the mean ± standard deviation (SD).

b. Resistance fold (RF) was calculated by the IC<sub>50</sub> values for vincristine of HEK293/pcDNA3.1 cell with Icotinib or known reversing agents, or the resistant cell lines in the presence or absence of Icotinib or reversing agents, divided by the IC<sub>50</sub> values for vincristine of HEK293/pcDNA3.1 without the reversing agents.

\*.  $P < 0.05$ , versus the control group.
